1        **Predator recognition and anti-predatory behaviour in a recent aquatic**  
2                    **invader, the killer shrimp (*Dikerogammarus villosus*)**

3

4                    Matteo Rolla<sup>1</sup>, Sonia Consuegra<sup>1</sup>, & Carlos Garcia de Leaniz\*<sup>1</sup>

5

6        <sup>1</sup>Department of BioSciences, Centre for Sustainable Aquatic Research, Swansea University,

7

Singleton Park, Swansea SA2 8PP, UK

8

\*corresponding author: [c.garciadeleaniz@swansea.ac.uk](mailto:c.garciadeleaniz@swansea.ac.uk)

9

10

11 **Abstract**

12 The killer shrimp (*Dikerogammarus villosus*) is one of the most recent, but also most  
13 damaging, aquatic invasive species in Europe, but information on how the species responds  
14 to novel predation pressures in recently invaded areas is very limited. We employed an open  
15 test arena to examine predator recognition and anti-predatory behaviour in killer shrimp  
16 exposed to either blank water or water conditioned with fish kairomones to simulate a  
17 predator threat. Within five years after their introduction, killer shrimp spent much more time  
18 hiding in the presence of fish kairomones than when they were exposed to blank water.  
19 However, no significant difference was found in aggregation behaviour, and killer shrimp  
20 were strongly attracted to the scent of conspecifics regardless of predator threat. Given the  
21 strong selective pressures that fish predators can exert on native and invasive gammarids, our  
22 findings highlight the need to consider prey-predator interactions to better predict the  
23 dispersal and likely impact of killer shrimp into invaded ecosystems.

24

25

26

27 **Keywords**

28 Invasive species, Anti-predatory strategy, Chemical recognition, Aggregation behaviour,

29 Killer shrimp

30

31

32

33

34

35

## 36 **Introduction**

37 From a prey-predator perspective two opposing selective forces may confront invasive  
38 species when they colonise a new area: the absence of former predators may facilitate their  
39 establishment (the enemy release hypotheses – Colautti et al. (2004), while their different  
40 appearance (the oddity effect - Almany et al. (2007) and lack of co-evolutionary history (the  
41 ‘naïve prey’ hypothesis - Sih et al. 2010) may curtail it. Thus, whether invasive species thrive  
42 or flounder may depend on what predators they encounter, and how they respond to them.  
43 This may result in ‘boom and bust’ cycles, reflecting prey-predator dynamics (Strayer et al.  
44 2017). Surprisingly, very little is known about anti-predatory strategies of invasive species in  
45 novel habitats.

46 The killer shrimp (*Dikerogammarus villosus*) is a freshwater gammarid indigenous to  
47 the Ponto-Caspian region which has recently invaded Western Europe (Tricarico et al. 2010),  
48 and which therefore constitutes a good system to examine anti-predatory strategies in novel  
49 habitats. The species has a small size (1.8-30mm; Aldridge 2015) a flexible omnivorous diet  
50 (Mayer et al. 2008), and lives in a wide variety of freshwater and brackish habitats (Devin &  
51 Beisel 2008) where it faces many different potential predators. Despite its very recent  
52 introduction, it is listed among the 100 most invasive species in Europe (DAISIE 2009) and  
53 included in the RINSE (Reducing the Impact of Non-Native Species in Europe) black list  
54 with a score of 9 out of 10 (Gallardo et al. 2016). It can displace and prey on local gammarids  
55 and reduce native biodiversity (Eckmann et al. 2008; Macneil et al. 2013), and may already  
56 be benefitting from a boom phase in some parts of Europe, having shed some of its former  
57 parasites (Arundell et al. 2015; Grabner et al. 2015). The need for more information on this  
58 aquatic invader has been flagged as a priority (Gallardo et al. 2016; Pöckl 2009), as it is  
59 predicted that the species will cause major deleterious impacts on native fauna (MacNeil et  
60 al. 2012).

61 Studies on the killer shrimp have focused mostly on its diet, there is very little information on  
62 its predators. The species appears to be trophically very plastic (Bacela-Spychalska & van der  
63 Velde 2013; Casellato et al. 2007; Platvoet et al. 2009), which would make it vulnerable to  
64 many different predators. Gammarids are an important prey for many fishes (Mazzi & Bakker  
65 2003; Perrot-Minnot et al. 2007) and there are reports that native brown trout and perch can  
66 feed on killer shrimp in Britain (Aldridge 2015; Madgwick & Aldridge 2011). However,  
67 knowledge on the predators of killer shrimp is mostly anecdotal and there is little information  
68 on anti-predatory behaviour of this species in newly colonized areas, which is an important  
69 aspect to consider for predicting its future spread and impact.

70 Hiding, aggregation and crypsis are three of the most common anti-predatory  
71 strategies in aquatic species (Keenleyside 1979), which in the case of benthic gammarids are  
72 intimately related to the nature of the substrate (Holomuzki & Hoyle 1990). Hiding behaviour  
73 is particularly strong in gammarids (Goedmakers 1981; Jazdzewski et al. 2004), and  
74 availability of suitable substrate to hide can be a key determinant of establishment success in  
75 invasive gammarids (Devin et al. 2003), as different species may compete for shelter. For  
76 example, De Gelder et al. (2016) reported that the killer shrimp's strong tendency to hide  
77 during daytime can displace the European native gammarid *Gammarus roeselii* from their  
78 shelters, which might put them at a higher risk of predation. Another common anti-predatory  
79 strategy is aggregation behaviour, as being part of a group can confuse predators (Krakauer  
80 1995; Krause & Ruxton 2002) and reduce the per-capita probability of being preyed (Codella  
81 & Raffa 1995). Aggregation behaviour, however, also has costs as it is influenced by  
82 competition for food and mating partners, and poses a greater risk of being parasitized, which  
83 may put the group at a disadvantage (Krause & Ruxton 2002).

84 Thus, while killer shrimp invading Europe could be benefitting from a boom phase  
85 caused by predator release, the oddity effect and prey naïvety of novel predators might make

86 them more vulnerable to native predators in the invaded waters. To shed light on this issue,  
87 we tested two anti-predatory behaviours (hiding and aggregation) in killer shrimp exposed to  
88 either dechlorinated water (control) or water conditioned with kairomones (i.e. semio-  
89 chemicals emitted by predators that allow eavesdropping by prey without benefitting the  
90 predator - Roberts & Garcia de Leaniz (2011) from a carnivorous fish predator, the three  
91 spined stickleback (*Gasterosteus aculeatus*). We wanted to test if killer shrimp from a  
92 recently colonized stream in Britain were able to recognise a common native fish as a  
93 predator or, on the contrary, displayed prey naïvety that might make it more difficult to  
94 mount an efficient anti-predatory response and, hence, make it more difficult to become  
95 established in neighbouring waters.  
96

97 **Materials and Methods**

98 *Collection and origin of samples*

99 Killer shrimp (average size =  $16.8 \pm 0.9$ mm) were collected by live trapping in the Upper  
100 Mother Ditch (Margam, Wales, 51°33'19.5"N 3°44'46.6"W) in May 2017, and three-spined  
101 stickleback (weight range 0.9-2.0g) were hand-netted from an ornamental pond in Swansea  
102 (Singleton Park, Wales 51°36'26.2 "N 3°58'52.4"W) in July 2017. We maintained the two  
103 species in separate 100L recirculation aquaculture systems at CSAR facilities (Swansea  
104 University) to avoid mixing their scents. Both species were fed frozen bloodworms, the  
105 sticklebacks every day and the killer shrimp three times per week. Water temperature was  
106 maintained at 15-16.5 °C with a weekly replacement of 20% volume.

107

108 *Experimental design*

109 We set up two experiments to examine the killer shrimp's anti-predatory behaviour in  
110 relation to the presence of stickleback's kairomones (a fish predator that feeds on  
111 gammarids). In the first experiment, we compared the hiding behaviour of individual killer  
112 shrimp tested in water conditioned with stickleback kairomones compared to blank water. In  
113 the second experiment, we examined the attraction of single killer shrimp to the scent of  
114 conspecifics in an open-test arena scented with stickleback kairomones or with blank water.  
115 We chose the three-spined stickleback as a test predator because it is a common predator of  
116 gammarids (Macneil et al. 1999; Mazzi & Bakker 2003) and was present at the study site  
117 (Upper Mother Ditch) where killer shrimp were first detected in 2011, having been detected  
118 in a nearby reservoir one year earlier, in November 2010 (Madgwick & Aldridge 2011).

119

120

121

122 *Water conditioning*

123 To obtain the kairomones used to simulate the presence of a predator, we housed 20  
124 stickleback (biomass = 2.9 g/L) in a 10L tank of dechlorinated water for 24 hours. The  
125 conditioned water was prepared freshly the day before the experiments.

126

127 *Experiment 1. Hiding behaviour under the threat of predation*

128 To quantify hiding behaviour under the threat of predation we used a 2L plastic tank  
129 (L:20cm, W:10cm, H:10cm) fitted with artificial grass patches (3cm<sup>2</sup>) glued to the bottom in  
130 a staggered fashion (Figure 1a), and a release cylinder (3.5cm diameter) located in the centre  
131 of the tank. At the beginning of the experiment 250ml of either dechlorinated water (control  
132 test) or fish-conditioned water (treatment) was added to the tank. One killer shrimp was  
133 placed inside the release cylinder and left to acclimatise for 5 min. The cylinder was then  
134 slowly lifted and the behaviour of the killer shrimp (time spent swimming or hiding in the  
135 artificial grass patches) was recorded for 10 minutes with a GoPro Hero camera mounted  
136 above the test tank (Figure 2A). In total, 20 individuals were tested with fish conditioned  
137 water and 20 individuals with blank water, the order of which was determined at random.

138

139 *Experiment 2. Conspecific attraction*

140 To test if killer shrimp were more attracted to conspecifics under the threat of predation, we  
141 used a tank of the same size and volume (2 L) as the one used in experiment 1, but in this  
142 case the bottom was left bare and did not have artificial grass patches. At the two extremes of  
143 the tank we attached two tea balls (diameter 5cm) and drew two lines in the tank to notionally  
144 divide it into three equal sectors, two choice zones associated with the tea balls, and a middle  
145 section that served as a neutral (no choice) zone (Figure 1b). Ten killer shrimp were  
146 introduced in one of the two tea balls chosen at random, while the other one was left empty.

147 As for experiment 1, 250ml of fish conditioned water or dechlorinated water were added to  
148 the tank and a single individual was introduced in the acclimatization cylinder, where it was  
149 left to acclimatize for 5min The cylinder was then removed, and the activity of the killer  
150 shrimp was recorded for 10 minutes with an overhead GoPro camera, as above. The time  
151 spent in each of the three tank zones was used to describe its behaviour: the time spent in the  
152 side containing the tea ball with conspecifics was interpreted as measure of attraction for  
153 group protection, the time spent in the central part was interpreted as neutral behaviour, and  
154 the time spent in the side with the empty tea ball was interpreted as avoidance of  
155 conspecifics. After each trial, the position of the two tea balls was alternated to control for  
156 possible external disturbances. In total, 40 killer shrimp were tested, 20 with dechlorinated  
157 water and 20 with fish scented water. The killer shrimp inside the tea ball were replaced  
158 between sessions to reduce aggressive behaviour due to confinement.

159

#### 160 *Statistical analyses*

161 We used R 3.3 (Team 2017), for analysis. For both experiments, we used a paired t-test to  
162 examine if (1) killer shrimp spent more time hiding than swimming when they were exposed  
163 to fish kairomones than when they were exposed to blank water (Experiment 1), and if (2)  
164 attraction to conspecifics was stronger when the killer shrimp were exposed to kairomones  
165 from a fish predator than when they were exposed to dechlorinated water (Experiment 2) .

166

#### 167 *Ethics Statement*

168 Experiments were carried out in accordance with Swansea University's Ethical guidelines  
169 and were approved by the Ethics Committee (070917/24, Reference Number:  
170 STU\_BIOL\_30638\_060617140454\_1). At the end of the experiments all sticklebacks were



171 released alive at the site of capture. The killer shrimp, due to the risk they may pose for  
172 native communities, were disposed through incineration.

173

174

175 **Results**

176 *Experiment 1. Hiding behaviour*

177 Killer shrimp spent significantly more time hiding when the water was conditioned with  
178 kairomones from a predatory fish (mean time  $\pm$  95CI = 543.45  $\pm$  13.7 s) than when they were  
179 tested against blank water (mean time  $\pm$  95CI = 386.75  $\pm$  18.5 s; behaviour x treatment  
180 interaction  $F_{1,76} = 544.02$ ,  $P < 0.001$ ; Figure 2). Controls spent 50% of their time hiding and  
181 50% swimming ( $t_{19} = 1.416$ ,  $P = 0.173$ ), whereas when they were exposed to fish kairomones  
182 they spent 91% of their time hiding and only 9% swimming ( $t_{19} = 34.789$ ,  $P < 0.001$ ).

183

184 *Experiment 2. Attraction to conspecifics*

185 Killer shrimp spent much more time in the side of the tank scented with conspecifics (mean  
186 time 477.5  $\pm$  20.5 s) than in the opposite side (mean time 39.1  $\pm$  12.2 s), but such preference  
187 was not affected by the presence of fish kairomones ( $t_{19} = 0.245$ ,  $P = 0.808$ ; Figure 3).

188

189

190

191 **Discussion**

192 Our study shows that within 6 years (approximately 20 generations) of their introduction into  
193 a novel area in Britain killer shrimp display a strong tendency to hide when they are exposed  
194 to the chemical scent of a native predatory fish (the three spined stickleback), but not when  
195 they are exposed to dechlorinated water. Given that no evidence of predator avoidance was  
196 detected on the same population in relation to the scent of non-predatory Nile tilapia (Rolla et  
197 al. 2019), this strongly suggests that chemical recognition of stickleback kairomones  
198 constitutes an evolved, adaptive trait.

199 Much of our knowledge on the invasive killer shrimp refers to its role as a predator,  
200 there is little information regarding its role as a fish prey. This is unfortunate because  
201 predatory fish can exert strong selective pressures on gammarids (Åbjörnsson et al. 2004;  
202 Ahlgren et al. 2011; Kinzler & Maier 2006; Kotta et al. 2010; Wudkevich et al. 1997) and  
203 could play a major role in determining the killer shrimp's invasion success. The killer shrimp  
204 has been found in the diet of 17 fish species found in the introduced range (9 exotic and 8  
205 native, Table 1), but predator recognition has only been reported for the European bullhead  
206 *Cottus gobio* (Sornom et al. 2012), the racer goby *Babka gymnotrachelus* (Jermacz et al.  
207 2017), and the spiny-cheek crayfish *Orconectes limosus* (Hesselschwerdt et al. 2009),  
208 therefore little is known about its antipredator behaviour. Amphipods can change their  
209 behaviour and habitat preferences when they detect chemical cues from potential predators  
210 (Baumgärtner et al. 2003; Thiel 2010), but also from injured conspecifics (Wisenden et al.  
211 2001; Wudkevich et al. 1997), similar to what has been observed among teleost fishes  
212 (Roberts & Garcia de Leaniz 2011). Kairomone detection by gammarids has been reported  
213 previously as an anti-predatory strategy (Wudkevich et al. 1997), but seldom in the context of  
214 invasion biology (Hesselschwerdt et al. 2009).

215 Predation by native species could reduce, or at least slow down, invasions by non-  
216 native species (Zuharah & Lester 2010; Zuharah & Lester 2011) because they may not be  
217 able to recognise native predators (Sih et al. 2010), but also because their different  
218 appearance could make them easier to detect, or make them more attractive, to native  
219 predators (the ‘oddity prey effect’, (Penry & Williams et al. 2018). For example, killer shrimp  
220 are typically larger than native freshwater gammarids (Devin et al. 2003), and this might  
221 make it easier for visual predators to detect them. However, native predators may also be  
222 reluctant to feed on novel prey due to neophobia (Champneys et al. 2018), and this could  
223 result on lower predation pressure on invasive species (Crawley 1987; MacNeil et al. 2000;  
224 Trowbridge 1995; Wells & Henderson 1993). Killer shrimp could also benefit from a  
225 ‘shadow of safety’ effect if their relative low abundance during the earlier stages of invasion  
226 deflects predation pressure to the more abundant native prey (Trillo et al. 2016). Killer  
227 shrimp can rapidly become the dominant species in invaded benthonic communities (Dick &  
228 Platvoet 2000) and can become the most abundant food resource for fish feeding on  
229 macroinvertebrates. For example, field studies have indicated that killer shrimp can replace  
230 native *Gammarus roeseli* in the diet of zoo-benthivorous fish (Eckmann et al. 2008), but  
231 other studies have suggested the opposite, and reported that native fish prefer to feed on  
232 native gammarids (Kinzler & Maier 2006).

233 Clearly, the role of predation on invasion dynamics is difficult to predict, but  
234 knowledge of the time since introduction, and of prey-predator interactions appear important  
235 in determining establishment success. This is particularly complicated in the case of the killer  
236 shrimp in Great Britain because although its arrival is very recent, it may have already  
237 learned to chemically recognise a range of novel predators during its long invasion of Europe.  
238 Killer shrimp in the British Isles are genetically similar to those in continental Europe  
239 (Rewicz et al. 2015), where the invasion started in 1992 after the opening of the Main-

240 Danube canal (Dick & Platvoet 2000), suggesting that they are stepping stones direct  
241 descendants from the first invaders. Stepping stones strategies drive the long distance  
242 dispersal of many species (Saura et al. 2014), and it is possible that repeated residencies in  
243 different habitats may have enabled the killer shrimp to learn to recognise different predators.  
244 Given that the three-spined stickleback is also widespread in continental Europe, our study  
245 cannot rule out that the observed predator recognition was acquired in Britain, or represents  
246 an older behavioural legacy from previous invasions.

247         Two common anti-predatory strategies in amphipods are to reduce mobility and  
248 become more aggregated under the risk of predation (Åbjörnsson et al. 2000; Williams &  
249 Moore 1985; Williams et al. 2016). Results from Experiment 1 in our study indicate that  
250 killer shrimp spend more time hiding and less time swimming when they were exposed to  
251 predator kairomones, as seen in other gammarids. These findings are also in agreement with  
252 those of Sornom et al. (2012) who observed a decrease in mobility and an increase in hiding  
253 time in killer shrimp exposed to the scent of another fish predator, the European bullhead  
254 (*Cottus gobio*). However, our results on aggregation behaviour (Experiment 2) are more  
255 equivocal. Unlike *Gammarus pulex*, which become increasingly aggregated when exposed to  
256 stickleback kairomones (Kullmann et al. 2008), killer shrimp in our study showed the same  
257 strong preference to remain in the vicinity of conspecifics even when there was no immediate  
258 threat of predation. Exposure to bullhead kairomones also failed to elicit an increase in killer  
259 shrimp aggregation (Sornom et al. 2012), but in this case aggregation was low. Jermacz et al.  
260 (2017) have shown that killer shrimp prefer to hide in response to predator cues, rather than  
261 aggregate, when refuges are present, and that they aggregate when there are no shelters and  
262 staying in a group is the only antipredator strategy possible. It is possible that aggregation  
263 behaviour in the killer shrimp depends on the availability of shelters, but also on the risk of  
264 intra-guild predation. Compared to native gammarids, killer shrimp display higher sociability

265 and lower incidence of cannibalism (Kinzler et al. 2009; Truhlar & Aldridge 2015), which  
266 may explain their strong tendency to aggregate. Aggregation behaviour can provide not only  
267 protection from fish predators (Åbjörnsson et al. 2004), but could also facilitate dispersal, as  
268 living in a group would increase the number of founders, and propagule pressure has been  
269 found to be an important factor determining invasion success (Consuegra et al. 2011;  
270 Ricciardi et al. 2010)

271

## 272 **Conclusions**

273 In conclusion, prey-predator dynamics are an important, but largely neglected, determinants  
274 of invasion success and our study indicates that knowledge of anti-predatory strategies might  
275 be important for predicting dispersal pathways and risk of establishment in the killer shrimp,  
276 and likely also on other aquatic invaders. Killer shrimp are dispersing at an alarmingly fast  
277 rate in Europe (DAISIE 2009; Gallardo et al. 2016), and prevention and control measures  
278 might benefit from information on prey and predators present in communities at risk. In this  
279 sense, behavioural profiling of anti-predatory strategies, using perhaps some of the simple  
280 assays shown in our study, could be incorporated into risk assessments. Knowledge of how  
281 invasive species might respond to resident predators can inform the development of more  
282 efficient management actions, as these seldom consider biotic resistance (Robinson et al.  
283 2019; Robinson et al. 2018). Given its strong aggregation behaviour, we also suggest that  
284 even when complete eradication is not possible, control measures that aim to reduce the  
285 density of killer shrimp might be beneficial, as a lower relative abundance and a smaller  
286 group size can make them more vulnerable to fish predators, potentially reducing their impact  
287 on native communities.

288

289

290 **Acknowledgments**

291 We are grateful to Emma Keenan and Graham Rutt (Natural Resources Wales) for help with  
292 the sampling. Funding was provided by the EC Horizon 2020 Aquainvad-ED project (Marie  
293 Sklodowska-Curie ITN-2014-ETN-642197) to SC.

294

295 **Author Contributions & Competing Interests**

296 MR and CGL designed the study. SC and CGL secured the funding. MR collected the data  
297 and carried out the analyses with advice from CGL. MR and CGL wrote the MS with  
298 contributions from SC. The authors declare no competing interests.

299

300

## 301 **References**

- 302 Åbjörnsson K, Dahl J, Nyström P, and Brönmark C. 2000. Influence of predator and dietary  
303 chemical cues on the behaviour and shredding efficiency of *Gammarus pulex*. *Aquatic*  
304 *Ecology* 34:379-387.
- 305 Åbjörnsson K, Hansson L-A, and Brönmark C. 2004. Responses of prey from habitats with  
306 different predator regimes: local adaptation and heritability. *Ecology* 85:1859-1866.
- 307 Ahlgren J, Åbjörnsson K, and Brönmark C. 2011. The influence of predator regime on the  
308 behaviour and mortality of a freshwater amphipod, *Gammarus pulex*. *Hydrobiologia*  
309 671:39-49.
- 310 Aldridge DC. 2015. Killer shrimp, *Dikerogammarus villosus*. Sand Hutton, York, UK: GB  
311 Non-native Species Secretariat
- 312 Almany GR, Peacock LF, Syms C, McCormick MI, and Jones GP. 2007. Predators target rare  
313 prey in coral reef fish assemblages. *Oecologia* 152:751-761.
- 314 Arundell K, Dunn A, Alexander J, Shearman R, Archer N, and Ironside JE. 2015. Enemy  
315 release and genetic founder effects in invasive killer shrimp populations of Great  
316 Britain. *Biological Invasions* 17:1439-1451.
- 317 Bacela-Spychalska K, and van der Velde G. 2013. There is more than one 'killer shrimp':  
318 trophic positions and predatory abilities of invasive amphipods of Ponto-Caspian  
319 origin. *Freshwater Biology* 58:730-741.
- 320 Baumgärtner D, Koch U, and Rothhaupt K-O. 2003. Alteration of kairomone-induced  
321 antipredator response of the freshwater amphipod *Gammarus roeseli* by sediment  
322 type. *Journal of chemical ecology* 29:1391-1401.
- 323 Borcherding J, Dolina M, Heermann L, Knutzen P, Krüger S, Matern S, van Treeck R, and  
324 Gertzen S. 2013. Feeding and niche differentiation in three invasive gobies in the  
325 Lower Rhine, Germany. *Limnologica-Ecology and Management of Inland Waters*  
326 43:49-58.
- 327 Casellato S, Visentin A, and La Piana G. 2007. The predatory impact of *Dikerogammarus*  
328 *villosus* on fish. *Biological invaders in inland waters: profiles, distribution, and*  
329 *threats*: Springer, 495-506.
- 330 Champneys T, Castaldo G, Consuegra S, and Garcia de Leaniz C. 2018. Density-dependent  
331 changes in neophobia and stress-coping styles in the world's oldest farmed fish. *Royal*  
332 *Society Open Science* 5:181473. doi:10.1098/rsos.181473
- 333 Codella SG, and Raffa KF. 1995. Contributions of female oviposition patterns and larval  
334 behavior to group defense in conifer sawflies (Hymenoptera: Diprionidae). *Oecologia*  
335 103:24-33.
- 336 Colautti RI, Ricciardi A, Grigorovich IA, and MacIsaac HJ. 2004. Is invasion success  
337 explained by the enemy release hypothesis? *Ecology Letters* 7:721-733.
- 338 Consuegra S, Phillips N, Gajardo G, and Garcia de Leaniz C. 2011. Winning the invasion  
339 roulette: Escapes from fish farms increase admixture and facilitate establishment of  
340 non-native rainbow trout. *Evolutionary Applications* 4:660-671.
- 341 Crawley MJ. 1987. What makes a community invasible? *Colonization, succession and*  
342 *stability*:429-453.
- 343 DAISIE. 2009. *Handbook of alien species in Europe*. Dordrecht: Springer.
- 344 De Gelder S, Van der Velde G, Platvoet D, Leung N, Dorenbosch M, Hendriks H, and  
345 Leuven R. 2016. Competition for shelter sites: Testing a possible mechanism for  
346 gammarid species displacements. *Basic and applied ecology* 17:455-462.
- 347 Devin S, and Beisel J-N. 2008. Geographic patterns in freshwater gammarid invasions: an  
348 analysis at the pan-European scale. *Aquatic Sciences* 70:100-106.



- 349 Devin S, Piscart C, Beisel J-N, and Moreteau J. 2003. Ecological traits of the amphipod  
350 invader *Dikerogammarus villosus* on a mesohabitat scale. *Archiv für Hydrobiologie*  
351 158:43-56.
- 352 Dick JT, and Platvoet D. 2000. Invading predatory crustacean *Dikerogammarus villosus*  
353 eliminates both native and exotic species. *Proceedings of the Royal Society of London*  
354 *Series B: Biological Sciences* 267:977-983.
- 355 Djikanovic V, Gacic Z, and Cakic P. 2010. Endohelminth fauna of barbel *Barbus barbus* (L.  
356 1758) in the Serbian section of the Danube River, with dominance of acanthocephalan  
357 *Pomphorhynchus laeavis*. *Bulletin of the European Association of Fish Pathologists*  
358 30:229-236.
- 359 Eckmann R, Mörtl M, Baumgärtner D, Berron C, Fischer P, Schleuter D, and Weber A. 2008.  
360 Consumption of amphipods by littoral fish after the replacement of native *Gammarus*  
361 *roeseli* by invasive *Dikerogammarus villosus* in Lake Constance. *Aquatic Invasions*  
362 3:187-191.
- 363 Gallardo B, Zieritz A, Adriaens T, Bellard C, Boets P, Britton JR, Newman JR, van  
364 Valkenburg JLCH, and Aldridge DC. 2016. Trans-national horizon scanning for  
365 invasive non-native species: a case study in western Europe. *Biological Invasions*  
366 18:17-30. 10.1007/s10530-015-0986-0
- 367 Giller PS. 2000. Dominant role of exotic invertebrates, mainly Crustacea. The Biodiversity  
368 Crisis and Crustacea-Proceedings of the Fourth International Crustacean Congress:  
369 CRC Press. p 35.
- 370 Goedmakers A. 1981. Population dynamics of three gammarid species. *Bijdragen tot de*  
371 *Dierkunde* 51:181-190.
- 372 Grabner DS, Weigand AM, Leese F, Winking C, Hering D, Tollrian R, and Sures B. 2015.  
373 Invaders, natives and their enemies: distribution patterns of amphipods and their  
374 microsporidian parasites in the Ruhr Metropolis, Germany. *Parasites & vectors*  
375 8:419.
- 376 Haubrock PJ, Balzani P, Johovic I, Inghilesi AF, Nocita A, and Tricarico E. 2018. The diet of  
377 the alien channel catfish *Ictalurus punctatus* in the River Arno (Central Italy). *Aquatic*  
378 *Invasions* 13.
- 379 Hesselschwerdt J, Tscherner S, Necker J, and Wantzen KM. 2009. A local gammarid uses  
380 kairomones to avoid predation by the invasive crustaceans *Dikerogammarus villosus*  
381 and *Orconectes limosus*. *Biological Invasions* 11:2133.
- 382 Holomuzki JR, and Hoyle JD. 1990. Effect of predatory fish presence on habitat use and diel  
383 movement of the stream amphipod, *Gammarus minus*. *Freshwater Biology* 24:509-  
384 517.
- 385 Jazdzewski K, Konopacka A, and Grabowski M. 2004. Recent drastic changes in the  
386 gammarid fauna (Crustacea, Amphipoda) of the Vistula River deltaic system in  
387 Poland caused by alien invaders. *Diversity and Distributions* 10:81-87.
- 388 Jermacz Ł, Andrzejczak J, Arczyńska E, Zielska J, and Kobak J. 2017. An enemy of your  
389 enemy is your friend: Impact of predators on aggregation behavior of gammarids.  
390 *Ethology* 123:627-639.
- 391 Jurajda P, Všetická L, Polačik M, and Vassilev M. 2013. Can round goby (*Neogobius*  
392 *melanostomus*) caught by rod and line be used for diet analysis? *Journal of Great*  
393 *Lakes Research* 39:182-185.
- 394 Keenleyside MH. 1979. Anti-predator behaviour. *Diversity and Adaptation in Fish*  
395 *Behaviour*: Springer, 44-62.
- 396 Kinzler W, Kley A, Mayer G, Waloszek D, and Maier G. 2009. Mutual predation between  
397 and cannibalism within several freshwater gammarids: *Dikerogammarus villosus*  
398 versus one native and three invasives. *Aquatic Ecology* 43:457.

- 399 Kinzler W, and Maier G. 2006. Selective predation by fish: a further reason for the decline of  
400 native gammarids in the presence of invasives? *Journal of Limnology* 65:27-34.
- 401 Kotta J, Orav-Kotta H, and Herkül K. 2010. Separate and combined effects of habitat-specific  
402 fish predation on the survival of invasive and native gammarids. *Journal of Sea  
403 Research* 64:369-372.
- 404 Krakauer DC. 1995. Groups confuse predators by exploiting perceptual bottlenecks: a  
405 connectionist model of the confusion effect. *Behavioral Ecology and Sociobiology*  
406 36:421-429.
- 407 Krause J, and Ruxton GD. 2002. *Living in groups*: Oxford University Press.
- 408 Kullmann H, Thünken T, Baldauf SA, Bakker TC, and Frommen JG. 2008. Fish odour  
409 triggers conspecific attraction behaviour in an aquatic invertebrate. *Biol Lett* 4:458-  
410 460.
- 411 Maazouzi C, Médoc V, Pihan J-C, and Masson G. 2011. Size-related dietary changes  
412 observed in young-of-the-year pumpkinseed (*Lepomis gibbosus*): stomach contents  
413 and fatty acid analyses. *Aquatic Ecology* 45:23-33.
- 414 Macneil C, Boets P, Lock K, and Goethals PLM. 2013. Potential effects of the invasive  
415 ‘killer shrimp’ (*Dikerogammarus villosus*) on macroinvertebrate assemblages and  
416 biomonitoring indices. *Freshwater Biology* 58:171-182. 10.1111/fwb.12048
- 417 MacNeil C, Boets P, and Platvoet D. 2012. ‘Killer shrimps’, dangerous experiments and  
418 misguided introductions: how freshwater shrimp (Crustacea: Amphipoda) invasions  
419 threaten biological water quality monitoring in the British Isles. *Freshwater Reviews*  
420 5:21-35. 10.1608/frj-5.1.457
- 421 Macneil C, Dick JT, and Elwood RW. 1999. The dynamics of predation on *Gammarus*  
422 spp.(Crustacea: Amphipoda). *Biological Reviews* 74:375-395.
- 423 MacNeil C, Elwood RW, and Dick JT. 2000. Factors influencing the importance of  
424 *Gammarus* spp.(Crustacea: Amphipoda) in riverine salmonid diets. *Archiv für  
425 Hydrobiologie*:87-107.
- 426 Madgwick G, and Aldridge DC. 2011. Killer shrimps in Britain: hype or horror. *British  
427 Wildlife* 22:408-412.
- 428 Mayer G, Maier G, Maas A, and Waloszek D. 2008. Mouthparts of the ponto-caspian invader  
429 *Dikerogammarus villosus* (Amphipoda: Pontogammaridae). *Journal of Crustacean  
430 Biology* 28:1-15.
- 431 Mazzi D, and Bakker T. 2003. A predator's dilemma: prey choice and parasite susceptibility  
432 in three-spined sticklebacks. *Parasitology* 126:339-347.
- 433 Penry Williams IL, Ioannou CC, and Taylor MI. 2018. The oddity effect drives prey choice  
434 but not necessarily attack time. *Ethology* 124:496-503.
- 435 Perrot-Minnot M-J, Kaldonski N, and Cézilly F. 2007. Increased susceptibility to predation  
436 and altered anti-predator behaviour in an acanthocephalan-infected amphipod.  
437 *International Journal for Parasitology* 37:645-651.
- 438 Platvoet D, Van Der Velde G, Dick JT, and Li S. 2009. Flexible omnivory in  
439 *Dikerogammarus villosus* (Sowinsky, 1894)(Amphipoda)-amphipod pilot species  
440 project (AMPIS) Report 5. *Crustaceana*:703-720.
- 441 Pöckl M. 2009. Success of the invasive Ponto-Caspian amphipod *Dikerogammarus villosus*  
442 by life history traits and reproductive capacity. *Biological Invasions* 11:2021-2041.
- 443 Rewicz T, Wattier R, Grabowski M, Rigaud T, and Bączela-Spychalska K. 2015. Out of the  
444 Black Sea: phylogeography of the invasive killer shrimp *Dikerogammarus villosus*  
445 across Europe. *PloS one* 10:e0118121.
- 446 Ricciardi A, Jones LA, Kestrup ÅSM, and Ward JM. 2010. Expanding the propagule pressure  
447 concept to understand the impact of biological invasions. In: Richardson DM, ed.  
448 *Fifty Years of Invasion Ecology*: Wiley-Blackwell, 225-238.

- 449 Roberts LJ, and Garcia de Leaniz C. 2011. Something smells fishy: predator-naïve salmon  
450 use diet cues, not kairomones, to recognize a sympatric mammalian predator. *Animal*  
451 *Behaviour* 82:619-625. 10.1016/j.anbehav.2011.06.019
- 452 Robinson CV, Garcia de Leaniz C, and Consuegra S. 2019. Effect of artificial barriers on the  
453 distribution of the invasive signal crayfish and Chinese mitten crab *Scientific Reports*.  
454 Robinson CV, Garcia de Leaniz C, James J, Cable J, Orozco-terWengel P, and Consuegra S.  
455 2018. Genetic diversity and parasite facilitated establishment of the invasive signal  
456 crayfish (*Pacifastacus leniusculus*) in Great Britain. *Ecology and Evolution* 8:9181-  
457 9191. 10.1002/ece3.4235
- 458 Rolla M, Consuegra S, Carrington E, Hall D, and Garcia de Leaniz C. 2019. Experimental  
459 evidence of invasion facilitation in the zebra mussel-killer shrimp system.  
460 *bioRxiv*:626432. 10.1101/626432
- 461 Saura S, Bodin Ö, and Fortin MJ. 2014. Stepping stones are crucial for species'  
462 long distance dispersal and range expansion through habitat networks. *Journal of*  
463 *Applied Ecology* 51:171-182.
- 464 Semenov DY. 2009. Data on morphology and biology of Caspian big-headed goby  
465 *Neogobius gorlap* (Perciformes, Gobiidae) from the Kuibyshev Reservoir. *Journal of*  
466 *Ichthyology* 49:834-837.
- 467 Sih A, Bolnick DI, Luttbeg B, Orrock JL, Peacor SD, Pintor LM, Preisser E, Rehage JS, and  
468 Vonesh JR. 2010. Predator-prey naïveté, antipredator behavior, and the ecology of  
469 predator invasions. *Oikos* 119:610-621.
- 470 Sornom P, Gismondi E, Vellinger C, Devin S, Féraud J-F, and Beisel J-N. 2012. Effects of  
471 sublethal cadmium exposure on antipredator behavioural and antitoxic responses in  
472 the invasive amphipod *Dikerogammarus villosus*. *PloS one* 7:e42435.
- 473 Strayer DL, D'Antonio CM, Essl F, Fowler MS, Geist J, Hilt S, Jaric I, Johnk K, Jones CG,  
474 Lambin X, Latzka AW, Pergl J, Pysek P, Robertson P, von Schmalensee M,  
475 Stefansson RA, Wright J, and Jeschke JM. 2017. Boom-bust dynamics in biological  
476 invasions: towards an improved application of the concept. *Ecol Lett* 20:1337-1350.  
477 10.1111/ele.12822
- 478 Team RC. 2017. R: A language and environment for statistical computing Vienna, Austria: R  
479 Foundation for Statistical Computing.
- 480 Thiel M. 2010. Chemical communication in peracarid crustaceans. *Chemical communication*  
481 *in crustaceans*: Springer, 199-218.
- 482 Tricarico E, Mazza G, Orioli G, Rossano C, Scapini F, and Gherardi F. 2010. The killer  
483 shrimp, *Dikerogammarus villosus* (Sowinsky, 1894), is spreading in Italy. *Aquatic*  
484 *Invasions* 5:211-214. 10.3391/ai.2010.5.2.14
- 485 Trillo PA, Bernal XE, Caldwell MS, Halfwerk WH, Wessel MO, and Page RA. 2016.  
486 Collateral damage or a shadow of safety? The effects of signalling heterospecific  
487 neighbours on the risks of parasitism and predation. *Proceedings of the Royal Society*  
488 *B: Biological Sciences* 283:20160343.
- 489 Trowbridge CD. 1995. Establishment of the green alga *Codium fragile* ssp. *tomentosoides* on  
490 New Zealand rocky shores: current distribution and invertebrate grazers. *Journal of*  
491 *Ecology*:949-965.
- 492 Truhlar AM, and Aldridge DC. 2015. Differences in behavioural traits between two  
493 potentially invasive amphipods, *Dikerogammarus villosus* and *Gammarus pulex*.  
494 *Biological Invasions* 17:1569-1579.
- 495 Wells JD, and Henderson G. 1993. Fire ant predation on native and introduced subterranean  
496 termites in the laboratory: effect of high soldier number in *Coptotermes formosanus*.  
497 *Ecological Entomology* 18:270-274.

- 498 Williams DD, and Moore KA. 1985. The role of semiochemicals in benthic community  
499 relationships of the lotic amphipod *Gammarus pseudolimnaeus*: a laboratory analysis.  
500 *Oikos*:280-286.
- 501 Williams KL, Navins KC, and Lewis SE. 2016. Behavioral responses to predation risk in  
502 brooding female amphipods (*Gammarus pseudolimnaeus*). *Journal of Freshwater*  
503 *Ecology* 31:571-581.
- 504 Wisenden BD, Pohlman SG, and Watkin EE. 2001. Avoidance of conspecific injury-released  
505 chemical cues by free-ranging *Gammarus lacustris* (Crustacea: Amphipoda). *Journal*  
506 *of chemical ecology* 27:1249-1258.
- 507 Wudkevich K, Wisenden BD, Chivers DP, and Smith RJF. 1997. Reactions of *Gammarus*  
508 *lacustris* to chemical stimuli from natural predators and injured conspecifics. *Journal*  
509 *of chemical ecology* 23:1163-1173.
- 510 Zuharah WF, and Lester PJ. 2010. Can adults of the New Zealand mosquito *Culex*  
511 *pervigilans* (Bergorth) detect the presence of a key predator in larval habitats? *Journal*  
512 *of Vector Ecology* 35:100-105.
- 513 Zuharah WF, and Lester PJ. 2011. Are exotic invaders less susceptible to native predators? A  
514 test using native and exotic mosquito species in New Zealand. *Population Ecology*  
515 53:307-317.

516

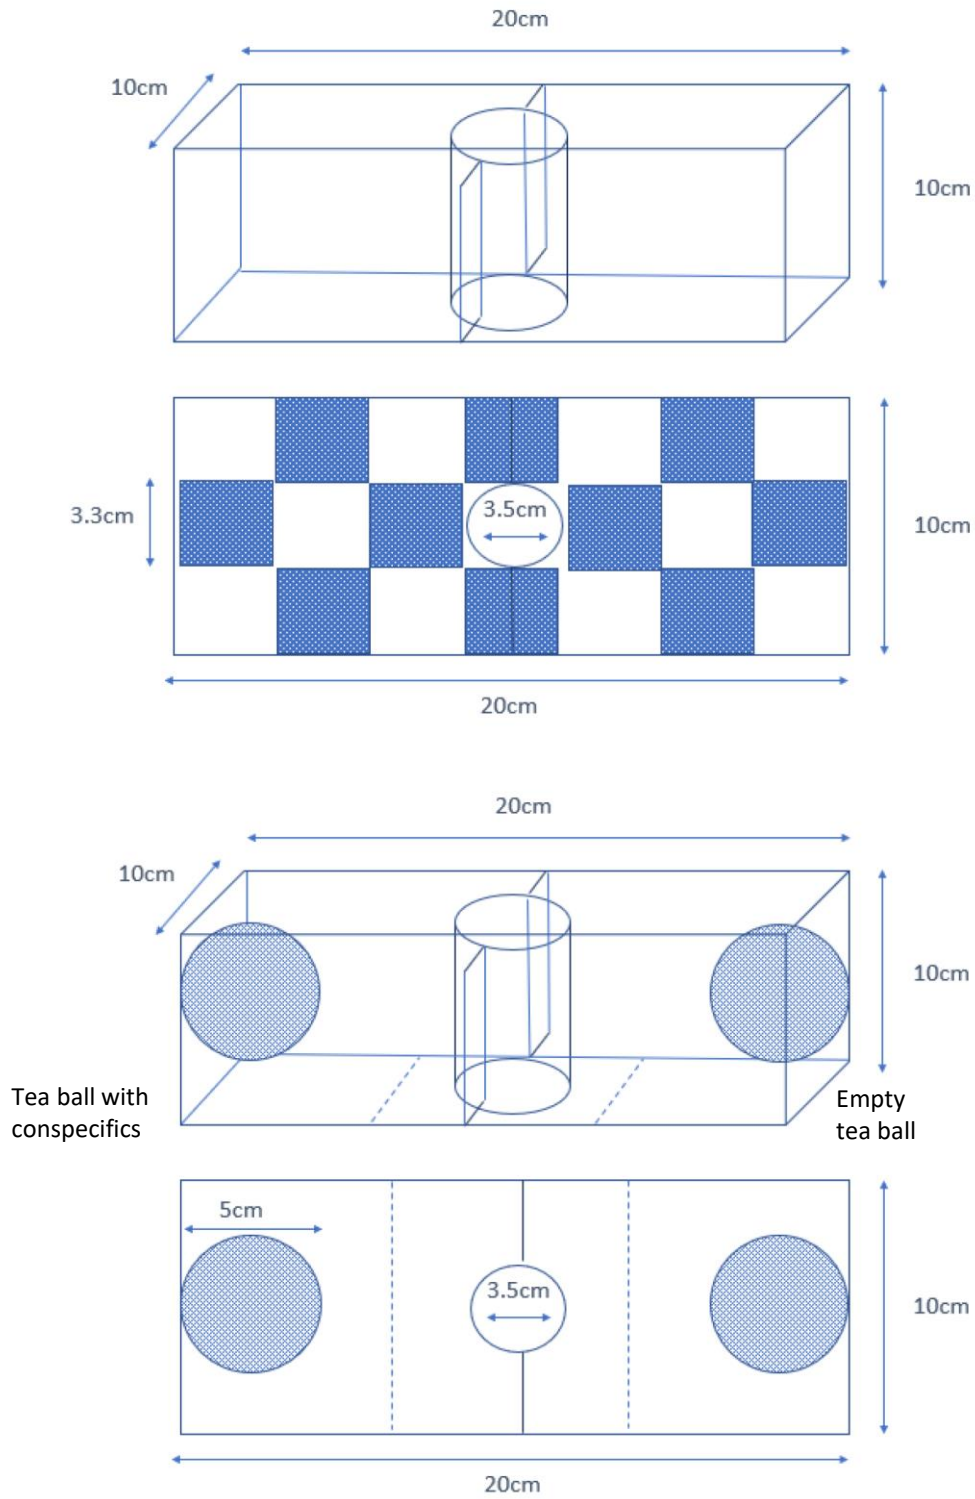

**A**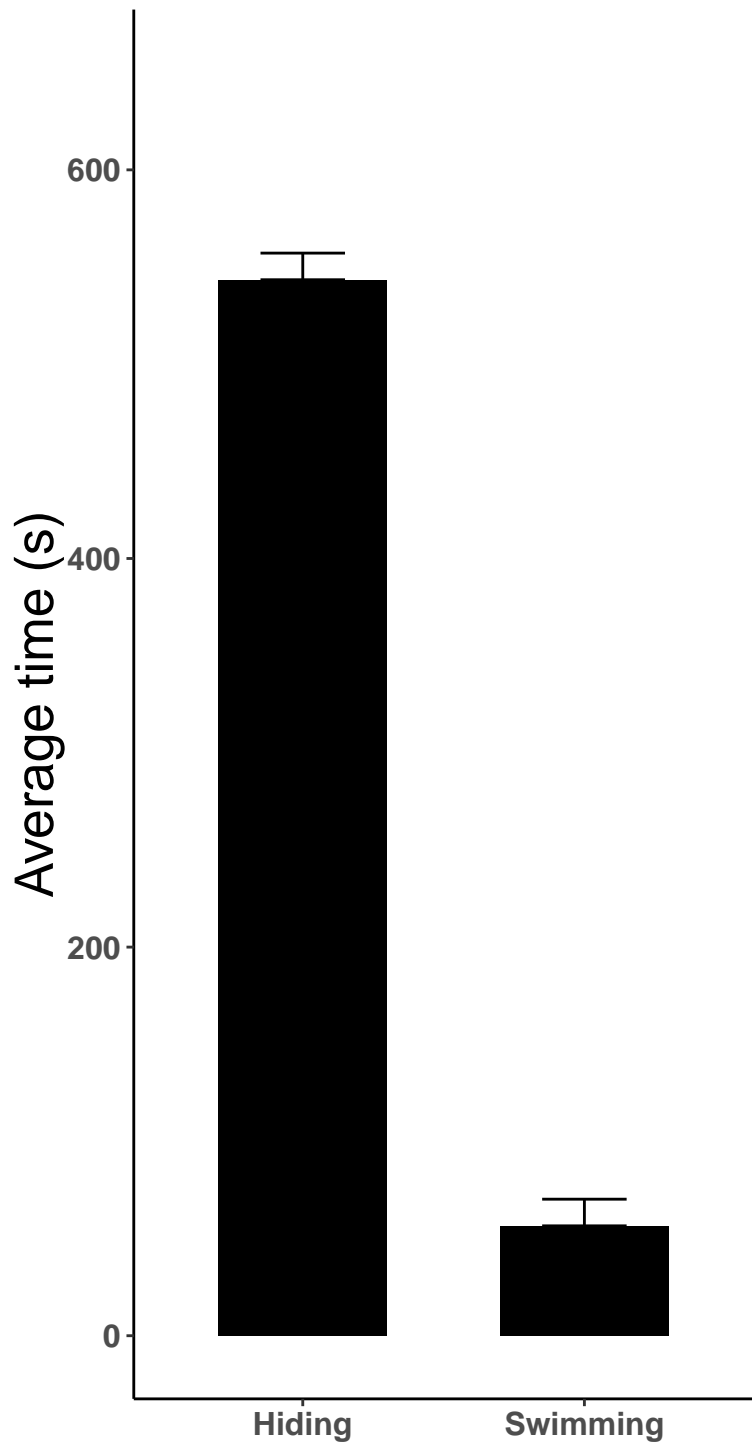**B**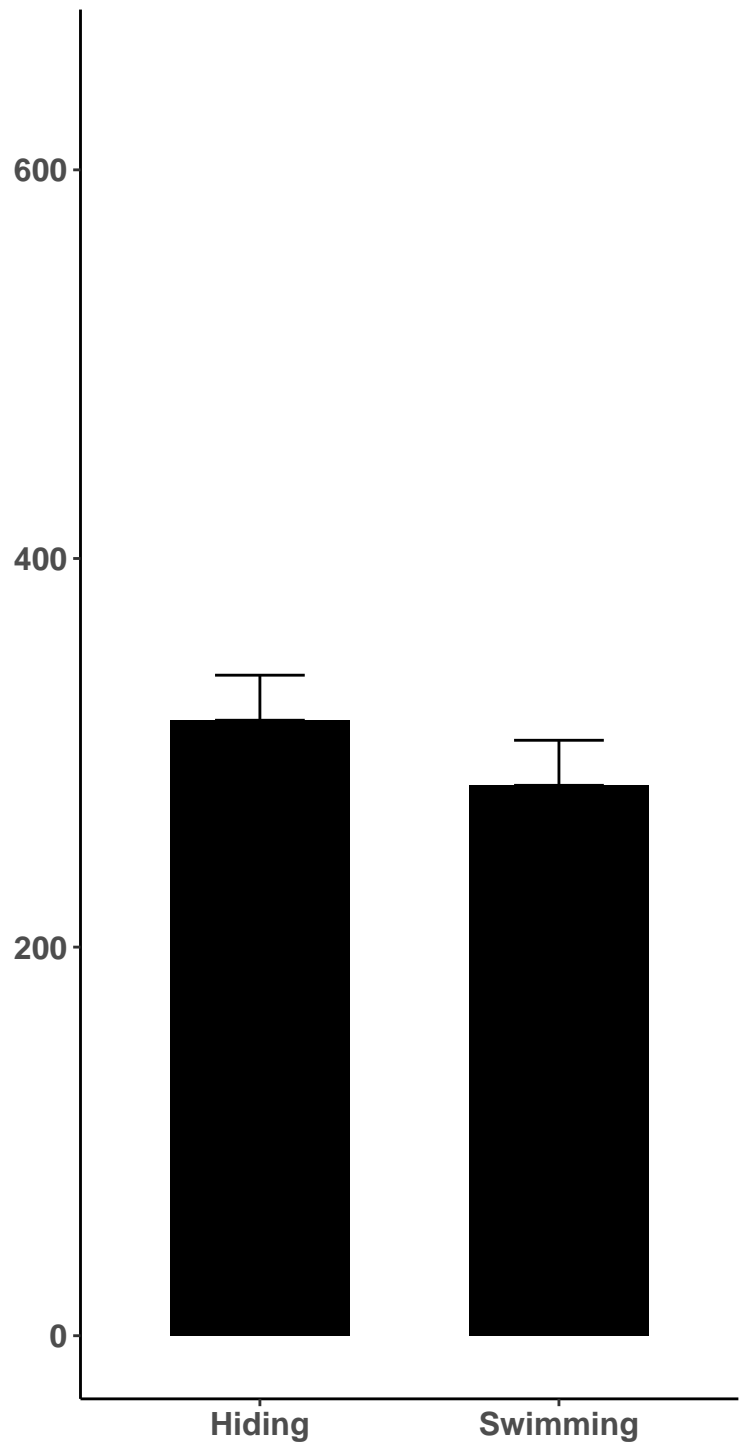

**A**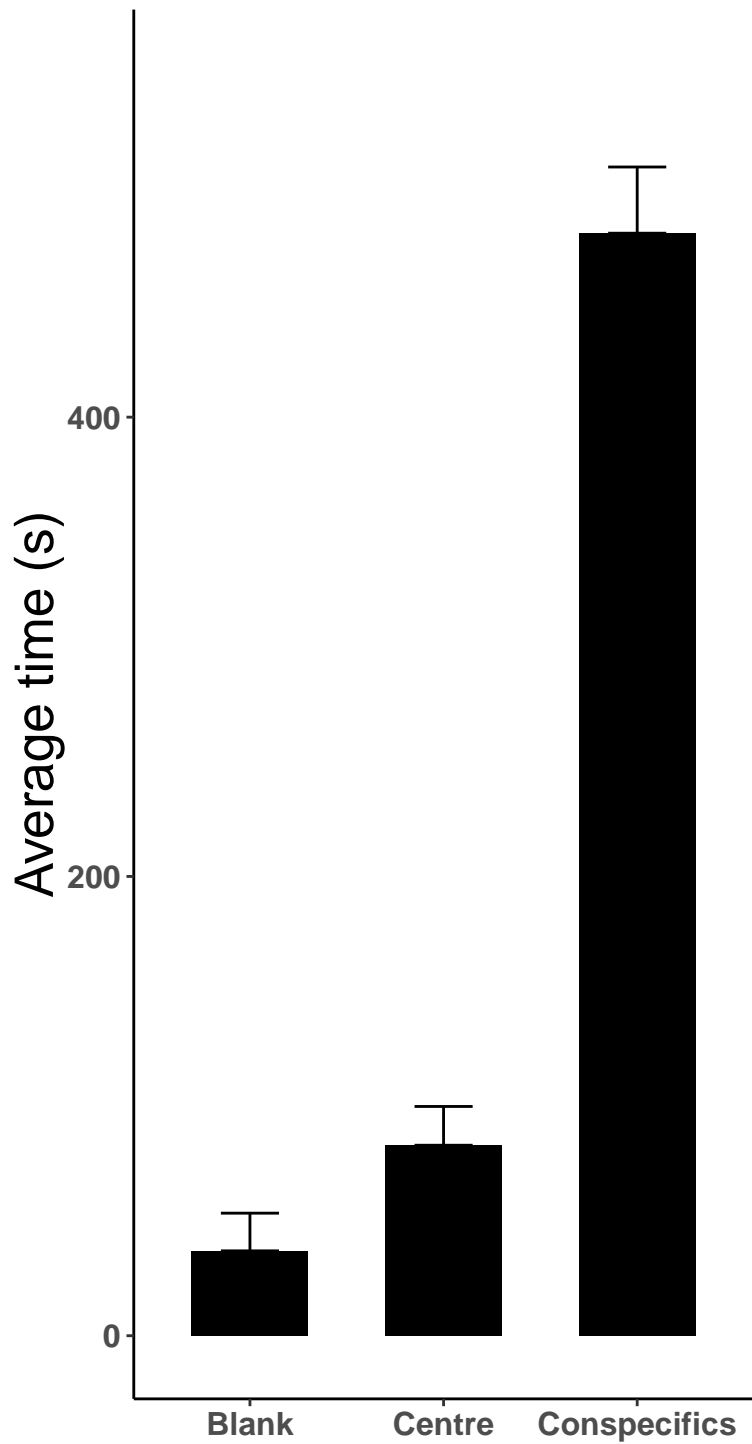**B**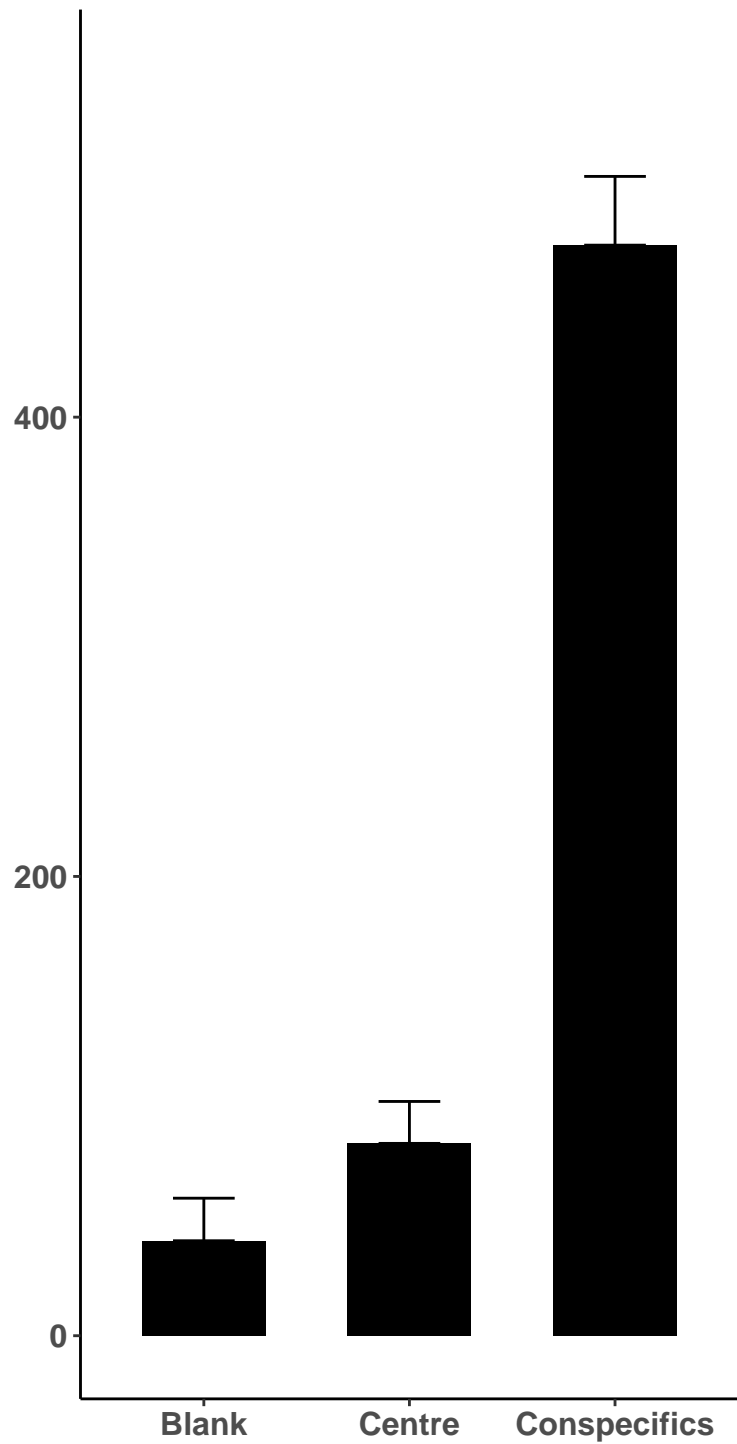

Source: https://www.biorxiv.org/content/10.1101/636100v1.full.pdf
